# Supplementary material for: Physiochemical property space distribution among human metabolites, drugs and toxins
Source: PubMed Central journal article supplement (PMC2788350; doi:10.1186/1471-2105-10-s15-s10), 2009-12-03
Supplement: 1471-2105-10-S15-S10-S1.pdf [file 1471-2105-10-S15-S10-S1.pdf]

## Additional File 1

### Physiochemical property space distribution among human metabolites, drugs and toxins

Varun Khanna, Shoba Ranganathan

**Table S1. Occurrence of discriminatory functional groups in the three datasets.**

The functional groups which are most distinguishable among the three datasets are shown in bold.

| Functional Group        | Metabolite dataset | Drugs dataset   | Toxin dataset   |
|-------------------------|--------------------|-----------------|-----------------|
| Aldehyde                | 2.1%               | 1.5%            | 1.0%            |
| <b>Alkyl halide</b>     | <b>&lt;0.5%</b>    | <b>&lt;0.5%</b> | <b>3.2%</b>     |
| <b>Aromatic atom</b>    | <b>17.4%</b>       | <b>70.6%</b>    | <b>62.3%</b>    |
| <b>Benzene</b>          | <b>10.3%</b>       | <b>56.0%</b>    | <b>53%</b>      |
| Benzoic Acid            | 1.0%               | 3.4%            | 3.5%            |
| Benzoic acid amide      | 0.5%               | 6.3%            | 1.5%            |
| Indole                  | 2.7%               | 3.8%            | 1.5%            |
| Flavone core            | 0.5%               | 0.7%            | 0.7%            |
| Lactam                  | 0.6%               | 3.6%            | 4.4%            |
| Prostaglandins          | 0.7%               | <0.5 %          | <0.5%           |
| <b>Steroid backbone</b> | <b>2.9%</b>        | <b>0.6%</b>     | <b>&lt;0.5%</b> |
| <b>HBA Ester</b>        | <b>56.3%</b>       | <b>13.8%</b>    | <b>15.4%</b>    |
| SP hybrid atom          | <0.5%              | 2.5%            | 2.9%            |
| <b>Pyridine</b>         | <b>1.2%</b>        | <b>6.4%</b>     | <b>5.3%</b>     |
| <b>Pyrimidine</b>       | <b>3.2%</b>        | <b>7.5%</b>     | <b>1.9%</b>     |
| Carboxylic acid         | 21.0%              | 24.1%           | 10.3%           |
| <b>Enamine</b>          | <b>3.2%</b>        | <b>10.31%</b>   | <b>3.41%</b>    |
| Enol                    | <0.5%              | 1.5%            | 1.3%            |
| Enol-Ether              | 5.5%               | 3.0%            | 3.3%            |
| Guanadine               | 2.3%               | 4.8%            | 1.8%            |

| Functional Group        | Metabolite dataset | Drugs dataset   | Toxin dataset |
|-------------------------|--------------------|-----------------|---------------|
| <b>Primary amine</b>    | <b>28%</b>         | <b>14.4%</b>    | <b>12.0%</b>  |
| <b>Secondary amine</b>  | <b>11.4%</b>       | <b>64.0%</b>    | <b>41.2%</b>  |
| <b>Tertiary amine</b>   | <b>44.6%</b>       | <b>80.0%</b>    | <b>60.0%</b>  |
| <b>Quaternary Amine</b> | <b>15.3%</b>       | <b>2.1%</b>     | <b>0.5%</b>   |
| <b>Primary amide</b>    | <b>1.5%</b>        | <b>4.5%</b>     | <b>3.9%</b>   |
| <b>Secondary amide</b>  | <b>11.4%</b>       | <b>31.0%</b>    | <b>14.5%</b>  |
| <b>Tertiary amide</b>   | <b>2.8%</b>        | <b>16.8%</b>    | <b>9.2%</b>   |
| <b>Imines</b>           | <b>4.1%</b>        | <b>14.0%</b>    | <b>6.4%</b>   |
| Isourea                 | 0%                 | <0.5%           | <0.5%         |
| Nitrate                 | 0%                 | 0%              | 0%            |
| Nitrite                 | 0%                 | <0.5%           | <0.5%         |
| Nitro                   | 0%                 | 0%              | 0%            |
| <b>Nitroso</b>          | <b>&lt;0.5 %</b>   | <b>0.6%</b>     | <b>8.4%</b>   |
| Oxime-Ether             | <0.5%              | 1.1%            | <0.5%         |
| Semicarbazide           | 0%                 | 0.7%            | 2.9%          |
| Isocyanate              | 0%                 | 0%              | <0.5%         |
| Hydrazine               | 0%                 | <0.5%           | 2.1%          |
| Diazo                   | 0%                 | <0.5%           | <0.5%         |
| Azide                   | 0%                 | 0%              | 0%            |
| <b>Azo</b>              | <b>0%</b>          | <b>&lt;0.5%</b> | <b>3.4%</b>   |
| <b>Carbamic acid</b>    | <b>&lt;0.5%</b>    | <b>3.1%</b>     | <b>1.9%</b>   |
| Carbamic acid ester     | <0.5%              | 2.3%            | 1.0%          |
| <b>Urea</b>             | <b>2.5%</b>        | <b>8.0%</b>     | <b>6.5%</b>   |
